# Supplementary material for: Beyond All Splits: Envisioning the Next Generation of Science on Mindfulness and Compassion in Schools for Students
Source: Springer Nature journal article supplement (doi:10.1007/s12671-022-02017-z), 2022-11-11

## Supplementary Figure S1

Google NGram Plot of “Mindfulness in Education” in English Language Books (1990-2019)

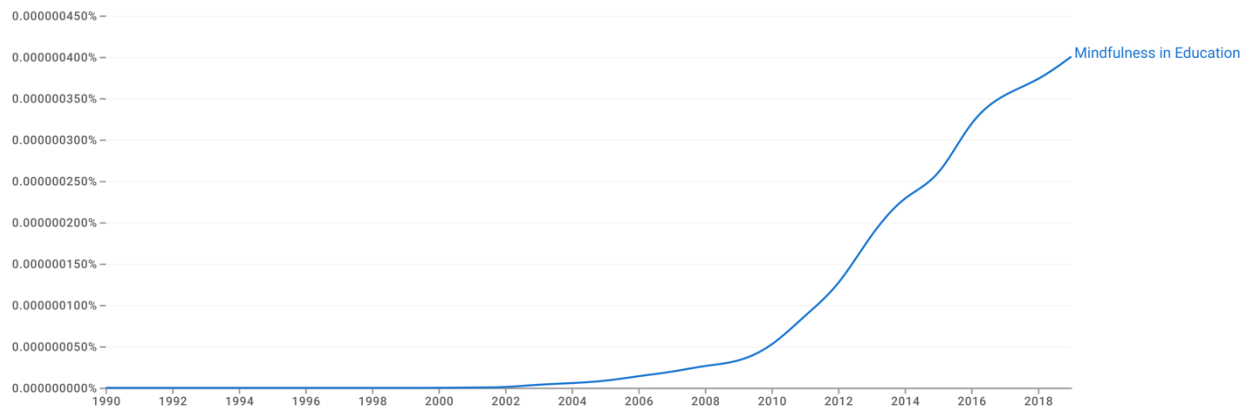

Supplement: MOESM1 [file 23704810]
